# Supplementary material
Source: Research Square preprint supplement (doi:10.21203/rs.3.rs-8858798/v1)
Supplement: Supplementary file 1 [file e1624af629513bf461d7bc1a.docx]

**Appendix:**

Table A 1: Mean, standard deviation (± 1SD) and 95% Cis for NEI VFQ-25 Rasch-transformed scores in logits (composite score, visual functioning [VF], socio-emotional [SE]) by duration of visual impairment. The rightmost columns display the overall p-value from one-way ANOVA and η² as an effect-size estimate.

|  | ***Onset of VI*** | ***N*** | ***Mean*** | ***SD*** | ***95 % CI*** | | ***p (ANOVA)*** | ***η²*** |
| --- | --- | --- | --- | --- | --- | --- | --- | --- |
|  |  |  |  |  | *l-CI* | *u-CI* |  |  |
| *NEI VFQ-25 C* | *< 1 Year* | 22 | 1.00 | 1.87 | *.16* | *1.8* |  |  |
| *> 3 Years* | 36 | .56 | 2.00 | -.11 | 1.24 |  |  |
| *Between 1-3 Years* | 11 | .26 | 1.70 | -.88 | 1.4 |  |  |
| *Total* | 69 | .65 | 1.91 |  |  | .54 | .02 |
| *NEI VFQ-VF* | *< 1 Year* | 22 | 1.02 | 2.10 | .09 | 1.95 |  |  |
| *> 3 Years* | 36 | .62 | 2.32 | -.16 | 1.41 |  |  |
| *Between 1-3 Years* | 11 | .09 | 2.20 | -1.4 | 1.57 |  |  |
| *Total* | 69 | .67 | 2.22 |  |  | .52 | .02 |
| *NEI VFQ-SE* | *< 1 Year* | 22 | .61 | 1.84 | -.2 | 1.4 |  |  |
| *> 3 Years* | 36 | .18 | 1.98 | -.49 | .85 |  |  |
| *Between 1-3 Years* | 11 | -.09 | 1.48 | -1.09 | .9 |  |  |
| *Total* | 69 | .27 | 1.86 |  |  | .55 | .02 |

Table A 2: Mean Between-Group-Difference and calculated MCID thresholds of NEI VFQ-25 Rasch-transformed logit scores (composite score, visual functioning [VF], socio-emotional [SE]) depending on onset of visual impairment. 1. = Onset of VI < 1 Year; 2 = Onset of VI > 3 Years; 3 = Onset of VI between 1-3 Years. * = |Diff| > MCID

|  | **NEI VFQ-25 C** | | | **NEI VFQ-VF** | | | **NEI VFQ- SE** | | |
| --- | --- | --- | --- | --- | --- | --- | --- | --- | --- |
| **Diff** | 1. – 2. | 1. – 3. | 2. – 3. | 1. – 2. | 1. – 3. | 2. – 3. | 1. – 2. | 1. – 3. | 2. – 3. |
| .44* | .74* | .30* | .40* | .93* | .53* | .43* | .70* | 0.27 |
| **MCID** | 0.19 | 0.25 | 0.23 | 0.23 | 0.31 | 0.29 | 0.35 | 0.46 | 0.44 |

Table A 3: Mean, standard deviation (SD), statistics and effect size of NEI VFQ-25 Rasch-transformed logit scores (composite score, visual functioning [VF], socio-emotional [SE]) depending on type of visual impairment

|  | ***Type of VI*** | ***n*** | ***Mean*** | ***SD*** | ***Sig (ANOVA)*** | ***η²*** |
| --- | --- | --- | --- | --- | --- | --- |
| *NEI VFQ-25C* | unilateral VI | 8 | .864 | 1.71 |  |  |
| unilateral blind | 10 | .357 | 1.97 |  |  |
| bilateral VI | 5 | 1.19 | 1.37 |  |  |
| bilateral blind | 6 | .941 | 1.67 |  |  |
| other VI | 15 | .751 | 2.21 |  |  |
| Total | 44 | .749 | 1.86 | .79 | .04 |
| *NEI VFQ-VF* | unilateral VI | 8 | .806 | 1.94 |  |  |
| unilateral blind | 10 | .174 | 2.49 |  |  |
| bilateral VI | 5 | 1.28 | 1.82 |  |  |
| bilateral blind | 6 | .844 | 1.85 |  |  |
| other VI | 15 | .959 | 2.59 |  |  |
| Total | 44 | .760 | 2.23 | .70 | .05 |
| *NEI VFQ-SE* | unilateral VI | 8 | .488 | 1.73 |  |  |
| unilateral blind | 10 | .310 | 1.75 |  |  |
| bilateral VI | 5 | 1.06 | 1.18 |  |  |
| bilateral blind | 6 | .851 | 1.52 |  |  |
| other VI | 15 | .041 | 2.14 |  |  |
| Total | 44 | .407 | 1.77 | .75 | .05 |

Table A 4: *Mean Between-Group-Difference and calculated* Minimal Clinically Important Difference (*MCID*) *thresholds of NEI VFQ-25 Rasch-transformed logit scores (composite score, visual functioning [VF], socio-emotional [SE]) depending on type of visual impairment*. * = |Diff| > MCID

|  | ***Nr.*** | ***Type of VI*** | ***Difference*** | | ***MCID Threshold*** |
| --- | --- | --- | --- | --- | --- |
| ***NEI VFQ-25C*** | 1 | unilateral VI | 1.-2. | .51* | .29 |
| 2 | unilateral blind | 1.-3. | -.33 | .34 |
| 3 | bilateral VI | 1.-4. | -.08 | .36 |
| 4 | bilateral blind | 1.-5. | .11 | .53 |
| 5 | other VI | 2.-3. | -.83* | .32 |
|  |  | 2.-4. | -.58* | .34 |
|  |  | 2.-5. | -.39* | .26 |
|  |  | 3.-4. | .25 | .38 |
|  |  | 3.-5. | .44* | .31 |
|  |  | 4.-5- | .19 | .33 |
| ***NEI VFQ-VF*** | 1 | unilateral VI | 1.-2. | .632* | .36 |
| 2 | unilateral blind | 1.-3. | -.47* | .42 |
| 3 | bilateral VI | 1.-4. | -.04 | .42 |
| 4 | bilateral blind | 1.-5. | -.15 | .36 |
| 5 | other VI | 2.-3. | -1.11* | .40 |
|  |  | 2.-4. | -.67* | .40 |
|  |  | 2.-5. | -.79* | .32 |
|  |  | 3.-4. | .44 | .45 |
|  |  | 3.-5. | .32 | .39 |
|  |  | 4.-5- | -.12 | .39 |
| ***NEI VFQ-SE*** | 1 | unilateral VI | 1.-2. | .18 | .54 |
| 2 | unilateral blind | 1.-3. | -.57 | .62 |
| 3 | bilateral VI | 1.-4. | -.36 | .64 |
| 4 | bilateral blind | 1.-5. | .45 | .53 |
| 5 | other VI | 2.-3. | -.75* | .58 |
|  |  | 2.-4. | -.54 | .61 |
|  |  | 2.-5. | .27 | .49 |
|  |  | 3.-4. | .21 | .68 |
|  |  | 3.-5. | 1.02* | .57 |
|  |  | 4.-5- | .81* | .60 |

Table A 5: Correlation Matrix of the Measured Variables Age, Sex, Onset VI (OVI), Type of VI (ToVI), Duration of Neck Pain (DNP), NEI VFQ-25C *(25C)*, NEI VFQ Visual Function (VF) & NEI VFQ Sozio-Emotional (SE), Numeric Rating Scale (NRS), Neck Disability Index (NDI), Motor Control Cervical Spine (MC CS), Falls Efficiacy Scale – International (FES-I) and Fullerton Advanced Balance Scale (FABS). rp = Pearson correlation coefficient; rs = Spearman correlation coefficient). * = p < .05; ** = p < .01

|  |  | **Age** | **Sex** | **OVI** | **ToVI** | **DNP** | **SE** | **VF** | **25 C** | **NRS** | **NDI** | **MC CS** | **FES-I** |
| --- | --- | --- | --- | --- | --- | --- | --- | --- | --- | --- | --- | --- | --- |
| **Sex** | Corr. Coef. | rp = .18 |  |  |  |  |  |  |  |  |  |  |  |
| Sig. | .113 |  |  |  |  |  |  |  |  |  |  |  |
| N | 80 |  |  |  |  |  |  |  |  |  |  |  |
| **OVI** | Corr. Coef. | rs = .07 | rs = .13 |  |  |  |  |  |  |  |  |  |  |
| Sig. | .562 | .261 |  |  |  |  |  |  |  |  |  |  |
| N | 80 | 80 |  |  |  |  |  |  |  |  |  |  |
| **ToVI** | Corr. Coef. | rs = -.17 | rs = .16 | rs = -.16 |  |  |  |  |  |  |  |  |  |
| Sig. | .227 | .251 | .263 |  |  |  |  |  |  |  |  |  |
| N | 52 | 52 | 52 |  |  |  |  |  |  |  |  |  |
| **DNP NP** | Corr. Coef. | rs = -.08 | rs = .16 | rs = -.00 | rs = .324* |  |  |  |  |  |  |  |  |
| Sig. | .49 | .15 | .99 | .02 |  |  |  |  |  |  |  |  |
| N | 80 | 80 | 80 | 52 |  |  |  |  |  |  |  |  |
| **SE LogIT SE** | Corr. Coef. | rp = .04 | rs = .11 | rs = -.18 | rs = -.01 | rs = -.03 |  |  |  |  |  |  |  |
| Sig. | .76 | .36 | .14 | .94 | .79 |  |  |  |  |  |  |  |
| N | 69 | 69 | 69 | 44 | 69 |  |  |  |  |  |  |  |
| **VF** | Corr. Coef. | rp = -.083 | rs = .04 | rs = -.14 | rs = .06 | rs = -.00 | rp = .821** |  |  |  |  |  |  |
| Sig. | .50 | .76 | .24 | .70 | .99 | < .001 |  |  |  |  |  |  |
| N | 69 | 69 | 69 | 44 | 69 | 69 |  |  |  |  |  |  |
| **25 C LogIT CS** | Corr. Coef. | rp = -.04 | rs = .04 | rs = -.14 | rs = .03 | rs = -.01 | rp = .903** | rp = .983** |  |  |  |  |  |
| Sig. | .75 | .74 | .26 | .85 | .92 | .00 | < .001 |  |  |  |  |  |
| N | 69 | 69 | 69 | 44 | 69 | 69 | 69 |  |  |  |  |  |
| **NRS** | Corr. Coef. | rp = .01 | rs = .299** | rs = -.03 | rs = .286* | rs = .765** | rp = .06 | rp = .06 | rp = .07 |  |  |  |  |
| Sig. | .90 | < .001 | .81 | .04 | < .001 | .62 | .61 | .58 |  |  |  |  |
| N | 80 | 80 | 80 | 52 | 80 | 69 | 69 | 69 |  |  |  |  |
| **NDI** | Corr. Coef. | rp = -.02 | rs = .21 | rs = .04 | rs = .25 | rs = .719** | rp = -.07 | rp = -.08 | rp = -.08 | rp = .725** |  |  |  |
| Sig. | .83 | .06 | .72 | .08 | < .001 | .57 | .50 | .50 | < .001 |  |  |  |
| N | 76 | 76 | 76 | 49 | 76 | 65 | 65 | 65 | 76 |  |  |  |
| **MC CS** | Corr. Coef. | rp = .18 | rs = -.05 | rs = -.01 | rs = .15 | rs = .234* | rp = .23 | rp = .14 | rp = .18 | rp = .243* | rp = .22 |  |  |
| Sig. | .11 | .69 | .95 | .30 | .04 | .06 | .24 | .15 | .03 | .05 |  |  |
| N | 80 | 80 | 80 | 52 | 80 | 69 | 69 | 69 | 80 | 76 |  |  |
| **FES-I** | Corr. Coef. | rp = -.00 | rs = .17 | rs = .08 | rs = .13 | rs = .19 | rp = -.06 | rp = -.12 | rp = -.12 | rp = .14 | rp = .511** | rp = .18 |  |
| Sig. | 1.00 | .13 | .50 | .34 | .09 | .64 | .32 | .32 | .21 | < .001 | .11 |  |
| N | 80 | 80 | 80 | 52 | 80 | 69 | 69 | 69 | 80 | 76 | 80 |  |
| **FABS** | Corr. Coef. | rp = -294** | rs = -.02 | rs = -.01 | rs = -.02 | rs = -.09 | rp = -.09 | rp = .08 | rp = .037 | rp = -.1 | rp = -.04 | rp = -357** | rp = -290** |
| Sig. | .01 | .83 | .92 | .90 | .44 | .48 | .51 | .76 | .39 | .76 | < .001 | .01 |
| N | 80 | 80 | 80 | 52 | 80 | 69 | 69 | 69 | 80 | 76 | 80 | 80 |
